# Supplementary material for: Moderate chlorophyll-a environments reduce coral bleaching during thermal stress in Yap, Micronesia
Source: PubMed Central journal article supplement (PMC10250426; doi:10.1038/s41598-023-36355-2), 2023-06-08
Supplement: 41598_2023_36355_MOESM2_ESM.pdf [file 41598_2023_36355_MOESM2_ESM.pdf]

Proportional Bleaching

| site     | reeftype | side | geography | <i>Leptoria</i> | <i>Dipsastraea</i> | <i>Diploastrea</i> | <i>Hydnophora</i> | <i>Goniastrea</i> | <i>Favites</i> | <i>Phymastrea</i> | <i>Cyphastrea</i> | <i>Platygyra</i> | <i>Acropora</i> | <i>Montipora</i> | <i>Porites</i> |
|----------|----------|------|-----------|-----------------|--------------------|--------------------|-------------------|-------------------|----------------|-------------------|-------------------|------------------|-----------------|------------------|----------------|
| 1 inner  | W        | SW   |           | 0.121           | 0.061111111        | 0.165454545        | 0.074253731       | 0.17025641        | 0.087419355    | 0.0695            | 0                 | 0.304347826      | 0.330291262     | 0.116666667      | 0.007873404    |
| 1 outer  | E        | SE   |           | 0.779357798     | 0.77739726         | 0                  | 0.270588235       | 0.321428571       | 0.351162791    | 0.264705882       | 0                 | 0.630434783      | 0.283716814     | 0.064305949      | 0.020588235    |
| 2 inner  | E        | SE   |           | 0               | 0                  | 0                  | 0.15              | 0.6               | 0              | 0                 | 0                 | 0                | 0.27            | 0.071428571      | 0.084257674    |
| 2 outer  | W        | SW   |           | 0.25            | 0.407275192        | 0                  | 0.294902549       | 0.255844466       | 0.313758493    | 0.13598355        | 0.012820513       | 0.776923077      | 0.520154281     | 0.091017391      | 0.010656455    |
| 3 inner  | E        | SE   |           | 0               | 0.35               | 0                  | 0.075             | 0.1708            | 0              | 0.086111111       | 0                 | 0                | 0.323689956     | 0.046794872      | 0.047118812    |
| 4 inner  | W        | NW   |           | 0               | 0.075              | 0                  | 0                 | 0.125             | 1              | 0.082142857       | 0                 | 0                | 0.101785714     | 0.123076923      | 0.054183831    |
| 5 outer  | W        | NW   |           | 0.077130745     | 0.793040146        | 0                  | 0.333127208       | 0.046453901       | 0.211854324    | 0.135135135       | 0.171666667       | 0.531625909      | 0.251918334     | 0.322202797      | 0              |
| 6 inner  | W        | SW   |           | 0               | 0                  | 0                  | 0                 | 0                 | 0              | 0                 | 0                 | 0                | 0.121296748     | 0.103424658      | 0.017295597    |
| 7 inner  | W        | NW   |           | 0               | 0.4                | 0.23               | 0                 | 0                 | 0              | 0.171261682       | 0                 | 0                | 0               | 0                | 0.080875096    |
| 7 outer  | E        | NE   |           | 0.421761658     | 0.667484663        | 0                  | 0.394649227       | 0.142772861       | 0.583333333    | 0.53362069        | 0                 | 0.990517241      | 0.367812356     | 0.061150016      | 0              |
| 8 inner  | E        | SE   |           | 0               | 0.083333333        | 0                  | 0                 | 0.3               | 0              | 0.102857143       | 0                 | 0                | 0.79            | 0.153764706      | 0.052930757    |
| 8 outer  | E        | NE   |           | 0.734954955     | 0.797560976        | 0                  | 0.715             | 0.349104478       | 0.416129032    | 0.333333333       | 0.3875            | 0.928125         | 0.526986028     | 0.201413276      | 0.85           |
| 9 inner  | E        | NE   |           | 0               | 0                  | 0                  | 0                 | 0                 | 0              | 0                 | 0                 | 0                | 0.25            | 0                | 0.007017544    |
| 9 outer  | W        | SW   |           | 0.55            | 0.099047619        | 0                  | 0.349142857       | 0.247808219       | 0.333125       | 0.201923077       | 0.042857143       | 0.736666667      | 0.514404762     | 0.205695364      | 0              |
| 10 inner | E        | SE   |           | 0               | 0                  | 0                  | 0                 | 0                 | 0              | 0                 | 0                 | 0                | 0               | 0.032289951      | 0.024332969    |
| 11 inner | E        | SE   |           | 0.093416928     | 0.520588235        | 0                  | 0.095454545       | 0.11326087        | 0.642592593    | 0.012048193       | 0                 | 0.438425926      | 0.2234375       | 0.0875           | 0.011636578    |
| 11 outer | E        | NE   |           | 0.671982759     | 0.908146067        | 0                  | 0.704             | 0.353409091       | 0.37804878     | 0.597727273       | 0                 | 0.720689655      | 0.439458689     | 0.123239437      | 0.65           |
| 12 inner | W        | NW   |           | 0.15            | 0                  | 0                  | 0                 | 0.344217687       | 0.166666667    | 0                 | 0                 | 0.1              | 0.43533582      | 0.15             | 0.029335634    |
| 12 outer | W        | SW   |           | 0.547222222     | 0.146551724        | 0.045              | 0.321538462       | 0.154285714       | 0.217073171    | 0.122222222       | 0.074782609       | 0.676            | 0.57122807      | 0.196763926      | 0.020833333    |
| 13 inner | W        | SW   |           | 0               | 0                  | 0                  | 0                 | 0                 | 0              | 0                 | 0                 | 0                | 0.1             | 0                | 0.007726316    |
| 13 outer | E        | SE   |           | 0.297876712     | 0.62375            | 0                  | 0.469850746       | 0.152071823       | 0.360393701    | 0.477435897       | 0.129464286       | 0.754339623      | 0.673076923     | 0.129230769      | 0.010526316    |
| 14 inner | E        | NE   |           | 0.053690685     | 0.45412844         | 0                  | 0                 | 0.692045117       | 0.65           | 0.34257885        | 0                 | 0.227218935      | 0.168823147     | 0                | 0.029950229    |
| 14 outer | W        | NW   |           | 0.399011628     | 0.559424084        | 0.507037037        | 0.510810811       | 0.28137931        | 0.299038462    | 0.358             | 0.045714286       | 0.752459016      | 0.316666667     | 0.110526316      | 0.175333333    |
| 15 inner | E        | NE   |           | 0.4             | 0                  | 0                  | 0.5               | 0.093333333       | 0              | 0                 | 0                 | 0                | 0.540540541     | 0                | 0.055489675    |
| 15 outer | E        | SE   |           | 0.591140603     | 0.842680262        | 0                  | 0.181271091       | 0.655560065       | 0.195568928    | 0.463896104       | 0                 | 0.691176471      | 0.352597403     | 0.094984359      | 0.184644412    |
| 16 outer | W        | NW   |           | 0.151130435     | 0.853716216        | 0                  | 0.364705882       | 0.098019324       | 0.30683908     | 0.47              | 0.145555556       | 0.534685315      | 0.235185185     | 0.298571429      | 0              |
| 17 outer | W        | SW   |           | 0.078571429     | 0.344074074        | 0                  | 0.093137255       | 0.09625           | 0.050701754    | 0                 | 0.030882353       | 0.293666667      | 0.198648649     | 0.141666667      | 0.096153846    |
| 18 outer | E        | NE   |           | 0.473055556     | 0.876711712        | 0                  | 0.393333333       | 0.251923077       | 0.251923077    | 0.642424242       | 0.125             | 0.79862069       | 0.424251208     | 0.13921875       | 0.092957746    |
| 20 outer | W        | NW   |           | 0.753947368     | 0.63556338         | 0                  | 0.697159091       | 0.3               | 0.544680851    | 0.114864865       | 0.040789474       | 0.932352941      | 0.371883469     | 0.141385768      | 0.185          |
