# Supplementary material for: Moderate chlorophyll-a environments reduce coral bleaching during thermal stress in Yap, Micronesia
Source: PubMed Central journal article supplement (PMC10250426; doi:10.1038/s41598-023-36355-2), 2023-06-08
Supplement: 41598_2023_36355_MOESM3_ESM.pdf [file 41598_2023_36355_MOESM3_ESM.pdf]

**% Coral Cover**

| site | reeftype | side | geography | <i>Leptoria</i> | <i>Dipsastraea</i> | <i>Diploastrea</i> | <i>Hydnophora</i> | <i>Goniastrea</i> | <i>Favites</i> | <i>Phymastrea</i> | <i>Cyphastrea</i> | <i>Platygyra</i> | <i>Acropora</i> | <i>Montipora</i> | <i>Porites</i> |
|------|----------|------|-----------|-----------------|--------------------|--------------------|-------------------|-------------------|----------------|-------------------|-------------------|------------------|-----------------|------------------|----------------|
| 1    | inner    | W    | SW        | 0.44            | 0.1733333333       | 0.08               | 3.64              | 0.3733333333      | 0.16           | 0.266666667       | 0.4               | 0.12             | 0.7333333333    | 0.1733333333     | 9.1333333333   |
| 1    | outer    | E    | SE        | 1.2533333333    | 0.746666667        | 0.04               | 0.2               | 0.3               | 0.2933333333   | 0.2133333333      | 0                 | 0.34             | 2.84            | 4.4133333333     | 0.12           |
| 2    | inner    | E    | SE        | 0               | 0.04               | 0                  | 0.08              | 0.12              | 0              | 0                 | 0                 | 0                | 0.08            | 0.0933333333     | 10.22666667    |
| 2    | outer    | W    | SW        | 0.182291667     | 0.389027778        | 0                  | 0.195694444       | 0.259861111       | 0.47           | 0.1858333333      | 0.1233333333      | 0.197916667      | 1.626527778     | 7.0133333333     | 0.497222222    |
| 3    | inner    | E    | SE        | 0               | 0.26               | 0.04               | 0.2               | 0.466666667       | 0              | 1.7733333333      | 0                 | 0                | 5.8133333333    | 1.12             | 5.306666667    |
| 4    | inner    | W    | NW        | 0               | 0.04               | 0                  | 0                 | 0.56              | 0.04           | 0.4933333333      | 0                 | 0                | 0.34            | 0.2933333333     | 14.68          |
| 5    | outer    | W    | NW        | 1.074202899     | 1.83942029         | 0.043478261        | 0.232463768       | 2.409275362       | 1.095072464    | 0.257391304       | 0.58              | 0.877681159      | 1.227246377     | 0.235942029      | 0.112463768    |
| 6    | inner    | W    | SW        | 0               | 0                  | 0                  | 0                 | 0.08              | 0              | 0.16              | 0                 | 0                | 5.84            | 1.0933333333     | 0.8533333333   |
| 7    | inner    | W    | NW        | 0               | 0.04               | 0.14               | 0.16              | 0.12              | 0              | 4.16              | 0                 | 0.04             | 0               | 0.04             | 5.826666667    |
| 7    | outer    | E    | NE        | 0.121818182     | 0.239393939        | 0                  | 0.506060606       | 0.232121212       | 0.167272727    | 0.129090909       | 0.04              | 0.055151515      | 1.663636364     | 4.258787879      | 0.24           |
| 8    | inner    | E    | SE        | 0               | 0.14               | 0                  | 0.04              | 0.1               | 0              | 0.12              | 0                 | 0.04             | 0.2             | 0.8933333333     | 4.08           |
| 8    | outer    | E    | NE        | 1.1333333333    | 1.1333333333       | 0                  | 0.266666667       | 1.066666667       | 0.2933333333   | 0.226666667       | 0.24              | 0.306666667      | 2.986666667     | 5.36             | 0.88           |
| 9    | inner    | E    | NE        | 0               | 0                  | 0                  | 0                 | 0                 | 0              | 0                 | 0                 | 0                | 0.24            | 0                | 4.8533333333   |
| 9    | outer    | W    | SW        | 0.1             | 0.6                | 0                  | 0.3733333333      | 1.5333333333      | 0.76           | 0.74              | 0.42              | 0.32             | 1.16            | 3.0533333333     | 0              |
| 10   | inner    | E    | SE        | 0               | 0                  | 0                  | 0                 | 0                 | 0              | 0.04              | 0                 | 0                | 0               | 0.27             | 8.195          |
| 11   | inner    | E    | SE        | 0.666666667     | 0.3                | 0.14               | 0.3733333333      | 0.2533333333      | 0.2            | 0.6               | 0                 | 0.2533333333     | 0.68            | 0.34             | 7.36           |
| 11   | outer    | E    | NE        | 1.4133333333    | 1.706666667        | 0                  | 0.546666667       | 0.5333333333      | 0.36           | 0.4133333333      | 0.22              | 0.4533333333     | 1.1333333333    | 4.3333333333     | 0.08           |
| 12   | inner    | W    | NW        | 0.041666667     | 0                  | 0                  | 0                 | 0.082222222       | 0.04           | 0                 | 0.0833333333      | 0.04             | 7.288888889     | 0.041666667      | 0.433888889    |
| 12   | outer    | W    | SW        | 0.24            | 0.4                | 0.24               | 0.666666667       | 0.9733333333      | 0.586666667    | 0.24              | 0.2533333333      | 0.346666667      | 0.84            | 6.386666667      | 0.066666667    |
| 13   | inner    | W    | SW        | 0               | 0                  | 0                  | 0                 | 0                 | 0              | 0                 | 0                 | 0                | 0.08            | 0.04             | 12.093333333   |
| 13   | outer    | E    | SE        | 2.5733333333    | 1.48               | 0                  | 0.9333333333      | 6.226666667       | 2.16           | 0.68              | 1.3733333333      | 0.7733333333     | 0.3333333333    | 0.2533333333     | 0.6133333333   |
| 14   | inner    | E    | NE        | 0.441666667     | 0.2011111111       | 0                  | 0.375             | 2.087777778       | 0.041666667    | 1.042777778       | 0.12              | 0.1608333333     | 0.842222222     | 0.245            | 8.753888889    |
| 14   | outer    | W    | NW        | 3.4533333333    | 4.08               | 0.48               | 1.04              | 3.28              | 0.6            | 0.4933333333      | 0.346666667       | 0.746666667      | 0.52            | 0.586666667      | 2              |
| 15   | inner    | E    | NE        | 0.04            | 0.06               | 0                  | 0.08              | 0.16              | 0              | 0.2533333333      | 0                 | 0                | 0.48            | 0.4              | 14.74666667    |
| 15   | outer    | E    | SE        | 2.410555556     | 0.548888889        | 0                  | 0.948888889       | 0.4161111111      | 0.1611111111   | 0.213888889       | 0.22              | 0.28             | 1.602777778     | 4.275555556      | 0.8983333333   |
| 16   | outer    | W    | NW        | 1.786666667     | 3.76               | 0.04               | 0.4               | 2.826666667       | 1.88           | 0.28              | 0.866666667       | 1.026666667      | 1.106666667     | 0.52             | 0.146666667    |
| 17   | outer    | W    | SW        | 0.44            | 0.706666667        | 0                  | 0.72              | 2.626666667       | 0.826666667    | 0.36              | 0.6133333333      | 0.32             | 1.44            | 1.466666667      | 0.7333333333   |
| 18   | outer    | E    | NE        | 0.826666667     | 2.226666667        | 0                  | 0.266666667       | 0.666666667       | 0.28           | 0.28              | 0.08              | 0.16             | 0.84            | 9.7333333333     | 1.22           |
| 20   | outer    | W    | NW        | 0.84            | 2.6933333333       | 0.06               | 0.96              | 1.946666667       | 0.826666667    | 0.746666667       | 0.48              | 0.586666667      | 2.706666667     | 2.146666667      | 1.08           |
